1  
2  
3  
4  
5  
6  
7  
8  
9  
10  
11  
12  
13  
14  
15  
16  
17  
18  
19  
20  
21  
22  
23  
24

# **Spring frost controls spring tree phenology along elevational gradients on the southeastern Tibetan Plateau**

**Running head:** Spring frost controls spring tree phenology

**Yafeng Wang<sup>1</sup>, Bradley Case<sup>2</sup>, Sergio Rossi<sup>3</sup>, Liping Zhu<sup>4,5</sup>, Eryuan Liang<sup>1,4,5\*</sup>, Aaron M. Ellison<sup>6</sup>**

<sup>1</sup>Key Laboratory of Alpine Ecology and Biodiversity, Institute of Tibetan Plateau Research, Chinese Academy of Sciences, Beijing 100085, China

<sup>2</sup> School of Science, Auckland University of Technology, Private Bag 92006, Auckland, 1142, New Zealand

<sup>3</sup>Département des Sciences Fundamentals, Laboratoires d'Écologie Végétale, University of Quebec in Chicoutimi, 555, Boulevard de l'Université, Chicoutimi (QC) G7H2B1, Canada

<sup>4</sup>CAS Center for Excellence in Tibetan Plateau Earth Sciences, Beijing 100101, China

<sup>5</sup>Key Laboratory of Tibetan Environment Changes and Land Surface Processes, Institute of Tibetan Plateau Research, Chinese Academy of Sciences, Beijing 100101, China

<sup>6</sup>Harvard Forest, Harvard University, 324 North Main St., Petersham, MA 01366, USA

**Correspondence author:** Eryuan Liang, e-mail: [Liangey@itpcas.ac.cn](mailto:Liangey@itpcas.ac.cn), Tel: +86 01084097069

**Keywords:** Spring phenology; bud swelling; leaf unfolding; conifer; spring frost; *Abies georgei* var. *smithii*, Altitudinal gradient

**Type of paper:** Primary Research Articles

25 **Abstract**

26 Temperature is considered to be a main driver of spring phenology, whereas the role of climate  
27 extremes (such as spring frosts) has long been neglected. A large elevational gradient of mature  
28 forests on the Tibetan Plateau provides a powerful space-for-time ‘natural experiment’ to explore  
29 driving forces of spring phenology. Combining 5-yr of in situ phenological observations of Smith  
30 fir (*Abies georgei* var. *smithii*) with concurrent air temperature data along two altitudinal  
31 gradients on the southeastern Tibetan Plateau, we tested the hypothesis that spring frost was a  
32 major factor regulating the timing of spring phenology. Onset of bud swelling and leaf unfolding  
33 in the study years occurred  $\approx$  18 or 17 days earlier, respectively, at the lowest (3800 m a.s.l.)  
34 elevation relative to upper treelines (4360 or 4380 m a.s.l.). The frequency of freezing events and  
35 last freezing date were critical factors in determining the timing of bud swelling along two  
36 altitudinal gradients, whereas onset of leaf unfolding was primarily controlled by the onset of  
37 bud swelling. This finding provides evidence for detrimental impacts of spring frost on spring  
38 phenology, which have been underappreciated in research on phenological sensitivity to climate  
39 but should be included in phenology models. It contributes to explain the declining global  
40 warming effects on spring phenophases, because climatic extreme events (e.g. spring frosts) tend  
41 to increase with warming.

42

43

## 44 **Introduction**

45 Phenology determines plant survival, growth, and distribution and plays an important role in  
46 ecosystem functioning and in the provision of ecosystem services (Chuine & Beaubien, 2001;  
47 Inouye, 2008; Forrest & Miller-Rushing, 2010). However, there are uncertainties about the  
48 drivers of phenology due to a paucity of a range of intensively-monitored sites (Richardson *et al.*,  
49 2013; Gallinat *et al.*, 2015; Piao *et al.*, 2015). Researchers attempting to generate time series long  
50 enough to make inferences about climate-driven changes in phenology often accumulate just one  
51 data point per year (Miller-Rushing *et al.*, 2010). Furthermore, most tree phenology data are  
52 limited to first flowering and leaf unfolding and rarely consider variation in other aspects of tree  
53 phenology (e.g., bud swelling) that may respond to climate differently from flowering or leaf  
54 unfolding ( Miller-Rushing & Primack, 2008 ).

55 For many species in temperate and cold ecosystems, temperature is the key factor  
56 controlling onset of spring phenology (Menzel, 2003; Piao *et al.*, 2011, 2015; Richardson *et al.*,  
57 2013; Huang *et al.*, 2014; Laube *et al.*, 2014; Chen *et al.*, 2015; Davis *et al.*, 2015; Fu *et al.*,  
58 2015; Ge *et al.*, 2015), although other climatic factors (e.g., precipitation, radiation, and  
59 photoperiod) can also play a role (Fu *et al.*, 2014a, b; Davis *et al.*, 2015; Ren *et al.*, 2015; Shen *et*  
60 *al.*, 2015a). Climate extremes, in particular, are important for understanding the climatic limits of  
61 tree species (Inouye, 2008; Zimmermann *et al.*, 2009), but few studies have explicitly linked  
62 spring phenophases to climatic extremes, such as late-season freezing temperatures (Inouye *et al.*,  
63 2008; Ernakovich *et al.*, 2014). In spring, plants experience a de-hardening period, during which  
64 a certain amount of heat is required to initialize leaf unfolding (Richardson *et al.*, 2013; Fu *et al.*,  
65 2014b); during this period, plants are particularly vulnerable to freezing events (Lenz *et al.*,  
66 2013). Spring freezing events tend to increase in response to climate warming (Inouye, 2000;

67 Augspurger , 2013; IPCC, 2013), and thus late-spring frosts may play an increasingly critical  
68 role in controlling spring phenology in temperate and cold regions (Inouye, 2008; Gu *et al.*, 2008;  
69 Wang *et al.*, 2014). Indeed, one recent study showed that spring frost affects the timing of  
70 bud-break which, in turn, determines the elevational and latitudinal limits of deciduous  
71 broad-leaf tree species in the Alps (Kollas *et al.*, 2014). However, less is known about the  
72 impacts of spring frost on spring phenology for conifers, which are the dominant species of many  
73 subalpine communities.

74 The Tibetan Plateau hosts mature, natural forests across a broad elevational gradient, which  
75 can be used as a space-for-time substitution for longer-term time series data in exploring key  
76 drivers of tree phenology. Satellite-based observations and process-based tree-ring growth model  
77 have confirmed that advancement of deciduous or semi-deciduous vegetation green-up-date on  
78 the Tibetan Plateau over the past three decades is tied closely to spring warming (Piao *et al.*,  
79 2011; Zhang *et al.*, 2013; Shen *et al.*, 2015b; Yang *et al.* 2017). However, the impact of spring  
80 freezing events on tree phenology is unknown, although spring frosts and freezes occur  
81 frequently on the Tibetan Plateau (Shen *et al.*, 2014).

82 We used a five-year dataset of precise, bud-scale measurements of spring phenophase  
83 timings to explore climatic drivers of spring phenology for Smith fir (*Abies georgei* var. *smithii*)  
84 along two altitudinal gradients. Specifically, we (1) revealed temporal patterns of spring  
85 phenophases along two altitudinal gradients; and (2) assessed effects of freezing events and  
86 growing degree days on spring phenophases. Given the frequent occurrence of spring freezing  
87 events on the southeastern Tibetan Plateau during the period when bud swelling is occurring  
88 (Shen *et al.*, 2014), we hypothesized that spring frost would be closely associated with the timing  
89 of bud swelling.

90

## 91 **Materials and methods**

### 92 *Study region and climate*

93 The study region is situated in the Sygera Mountains (29° 10' – 30° 15' N, 93° 12' – 95° 35'E) on  
94 the southeastern Tibetan Plateau. The south Asian monsoon approaches the Sygera Mountains  
95 through the valley of Yarlung Zangbo River, resulting in plentiful summer rainfall (Liang *et al.*,  
96 2010). Records from the Nyingchi weather station (29° 34' N, 94° 28' E, 3000 m a.s.l.) showed  
97 that the mean annual precipitation from 1960 to 2013 was 672 mm, 72% of which occurred from  
98 June to September (Liang *et al.*, 2010). July (mean temperature of 15.9 °C) and January (0.6 °C)  
99 were the warmest and coldest months, respectively.

100 Based on an automatic weather station (4390 m a.s.l.) near the treeline on the eastern-facing  
101 slopes installed in November 2006, the annual average precipitation at our study sites from 2007  
102 to 2013 was 957 mm, 62 % of which fell during the monsoon season (June to September). The  
103 warmest and coldest months were July ( $7.9 \pm 0.5$  °C) and February ( $-8.0 \pm 1.7$  °C), respectively.  
104 Snowfall of 50-100 cm usually occurs from November to mid-May.

105

### 106 *Study species and study sites*

107 Smith fir (*Abies georgei* var. *smithii*) is an evergreen coniferous tree species distributed on the  
108 north- or southeast-facing slopes on the southeastern Tibetan Plateau (Liang *et al.*, 2011). It  
109 grows along the altitudinal gradient ranging from 3550 to 4400 m a.s.l., with growth primarily  
110 constrained by low temperatures (Liang *et al.*, 2010; Li *et al.*, 2013, 2017). We studied Smith fir  
111 at eight sites along two altitudinal transects: four sites on a southeast-facing slope (labelled as  
112 SE3800, SE4000, SE4200 and SE4360, with the number indicating m a.s.l) and four sites on a

113 north-facing slope (N3800, N4000, N4200, N4380) (Fig. S1). At each site, 10 trees were selected  
114 for measurement, except for at site SE4200 where only 6 trees were measured. We used a  
115 measuring tape to determine the height of each sampled tree in April 2012, when buds were  
116 dormant. We estimated tree age by counting the internodes along the main stem (see also the  
117 methods in Liang *et al.*, 2011).

118

### 119 *Phenology measurements*

120 We made phenological observations on trees weekly between May and September during five  
121 consecutive years (2012–2016). From observations of terminal buds we recorded the dates of  
122 bud swelling, and leaf unfolding. The onset of bud swelling and leaf unfolding was determined  
123 as the dates when trees showed swollen buds or unfolded needles in shoot apices. For all  
124 monitored trees, high resolution photographs were taken at each phenological measurement visit  
125 with a steel ruler (accuracy of 1 mm) placed behind the shoot apex. In the results, we report  
126 “dates” as days elapsed since 1 May each year

127

### 128 *Temperature data*

129 Air temperature ( $\pm 0.2$  °C) in each stand was measured hourly with a temperature logger (TidbiT  
130 v2 Temp UTBI-001, Onset Computer Corporation, Bourne, MA, USA) that was placed 2 m  
131 above the ground under the canopy of a tall mature tree. Loggers were not placed under studied  
132 trees, which had small main stems. An epoxy radiation shield designed by the logger  
133 manufacturer was covered each sensor to minimize effects of direct sunlight on the  
134 measurements.

135 The frequency of spring freezing events was calculated as the number of days with daily  
136 minimum temperature  $< 0\text{ }^{\circ}\text{C}$  in spring (Shen *et al.*, 2014). The last freezing date was defined as  
137 the last spring day when daily minimum temperature  $< 0\text{ }^{\circ}\text{C}$  (Schwartz *et al.*, 2006). Safety  
138 margins were defined as the number of days between the last freezing date and the onset of bud  
139 swelling (Dantec *et al.*, 2015).

140 A winter chilling requirement is considered to be an important factor that determines the  
141 onset of spring phenophases (Fu *et al.*, 2015). We first estimated the number of chilling days as  
142 the sum of days in the winter when daily temperature  $< 0\text{ }^{\circ}\text{C}$  (Yu *et al.*, 2010; Fu *et al.*, 2015).  
143 Accumulated daily mean temperature above a certain threshold, *i.e.*, growing degree-days, also  
144 has been considered to be an important factor driving the onset of leaf phenology (Fu *et al.*,  
145 2014b). As compared to warmer areas, vegetation in colder environment such as Tibetan Plateau  
146 requires lower threshold temperature to green up (Piao *et al.*, 2011). Thus a minimum  
147 temperature of  $0\text{ }^{\circ}\text{C}$  was used as a basis to accumulate degree-days, starting with the date when  
148 the mean daily air temperature was  $> 0\text{ }^{\circ}\text{C}$  for at least 5 consecutive days from March and  
149 continuing until the onset of bud swelling and leaf unfolding.

#### 150 *Data analysis*

151 We used regression tree modelling to investigate the influence of the many explanatory factors  
152 hypothesized to be important in controlling timing of bud swelling and leaf unfolding (Table 1).  
153 For the onset of bud swelling, we investigated the effects of both warmth-related variables  
154 (accumulated growing degree-days, minimum, and maximum temperatures) and frost-related  
155 variables (frequency of spring freezing events and last spring freezing date). We evaluated the  
156 impacts of three variables (elevation, aspect, and year) on the safety margins. For leaf unfolding,  
157 we sought to understand how different measures of spring warmth controlled the onset of this

158 phenophase; as leaf unfolding occurred in June, we did not include spring frost variables in these  
159 models because frost was not present at this time of the year. In all models, both aspect and year



160

161 **Table 1** Description of predictor variables used in the regression tree modelling of spring phenology (date of onset of bud swelling and  
 162 leaf unfolding). All climate-related variables were computed for each site and measurement year based on temperature logger data.  
 163 BS and LF represented bud swelling and leaf unfolding, respectively.

| Variable name | Description                                                                 | In Modeling |     |
|---------------|-----------------------------------------------------------------------------|-------------|-----|
|               |                                                                             | BS          | LF  |
| Degree_days   | Cumulative temperatures (above 0°C) from March up to phenophase onset       | Yes         | Yes |
| Min_tem       | Minimum daily temperature recorded at time of phenophase onset              | Yes         | Yes |
| Max_tem       | Maximum daily temperature recorded at time of phenophase onset in each year | Yes         | Yes |
| FFE           | Number of days/year with daily minimum temperature < 0°C from March to May  | Yes         | No  |
| LFD           | Last freezing date in spring (March to May)                                 | Yes         | No  |
| Aspect        | The aspect of a given sample plot                                           | Yes         | Yes |
| Year          | Year of measurement (2012-2016)                                             | Yes         | Yes |
| Chilling days | Number of days with daily temperature < 0°C in winter                       | Yes         | No  |

164

165 of measurement also were included to control for the effects of these factors related to sampling  
166 design (Table 1). As elevation is a proxy for, and was significantly correlated with, several  
167 temperature variables in this study, it was not included in the modelling.

168 We used a two-stage modelling approach. First we used random forest analysis (Breiman,  
169 2001) to estimate and rank the importance of each explanatory factor in describing variability in  
170 the response variables. Second, we used conditional inference trees to gain further insights into  
171 the nature of relationships between each response variable and the most important explanatory  
172 factors. These two non-parametric, machine-learning methods of analysis allow for the  
173 construction of complex, non-linear models with inter-correlated predictor variables (De'ath &  
174 Fabricius, 2000; Cutler *et al.*, 2007). The random forest approach averages the outcomes of  
175 thousands of bootstrapped regression trees ('forests') to identify those measured explanatory  
176 variables that are the best predictor variables. We used the random forest 'variable importance'  
177 measure to identify the most influential factors in explaining variation in the response variable  
178 and then used partial dependence plots to show the marginal effect of each of these factors (*i.e.*,  
179 while holding all of the other explanatory factors at their average values) on the response  
180 variable (Cutler *et al.*, 2007). The relative importance of the top-ranked predictor variables was  
181 investigated further using conditional inference trees (Hothorn *et al.*, 2006) derived from a  
182 recursive partitioning method that generates a set of decision rules describing how variation in  
183 the response data is best attributed to each predictor. The conditional inference tree method  
184 requires a statistically significant difference ( $P < 0.05$ ), as determined by Monte Carlo simulation,  
185 to create a partition in the data; this algorithm minimizes bias and prevents over-fitting and the  
186 need for tree pruning (Hothorn *et al.*, 2006). Random forest and conditional inference tree

187 analyses were implemented in R version 3.1.0 using the ‘randomForest’ (Liaw & Wiener, 2002)  
188 and ‘party’ (Hothorn *et al.*, 2006) packages, respectively.

189

## 190 **Results**

### 191 *Tree size*

192 On the southeast-facing slope, trees ranged from 0.47 – 1.57 m in height and were estimated to  
193 be 13 – 40 years old (Table S1). The trees on the north-facing slope were 0.39 – 1.83 m in height  
194 and 10 – 44 years old (Table S1).

195

### 196 *Among-site variation in phenology*

197 Bud swelling and leaf unfolding began in early May and ended in late May, and occurred on later  
198 dates at higher elevations (Fig. 1). On average, the mean lapse rate for the onset of bud swelling  
199 was  $3.1 \pm 0.5$  days/100 m in elevation gain; the difference in timing of bud swelling between the  
200 lowest and highest sites was  $18 \pm 3$  days. Leaf unfolding began in late June and ended in  
201 mid-July; the mean lapse rate for this phenophase was  $3.0 \pm 0.6$  days/100 m, leading to a  
202 difference in timing of  $17 \pm 3$  days between the lowest and highest sites. Although the lapse rate  
203 and duration of each phenophase did not differ among trees on the north- and southeast-facing  
204 sites, the mean dates of bud swelling and leaf unfolding were  $2 \pm 1$  days later for trees growing  
205 on the north-facing sites than southeast-facing sites.

206

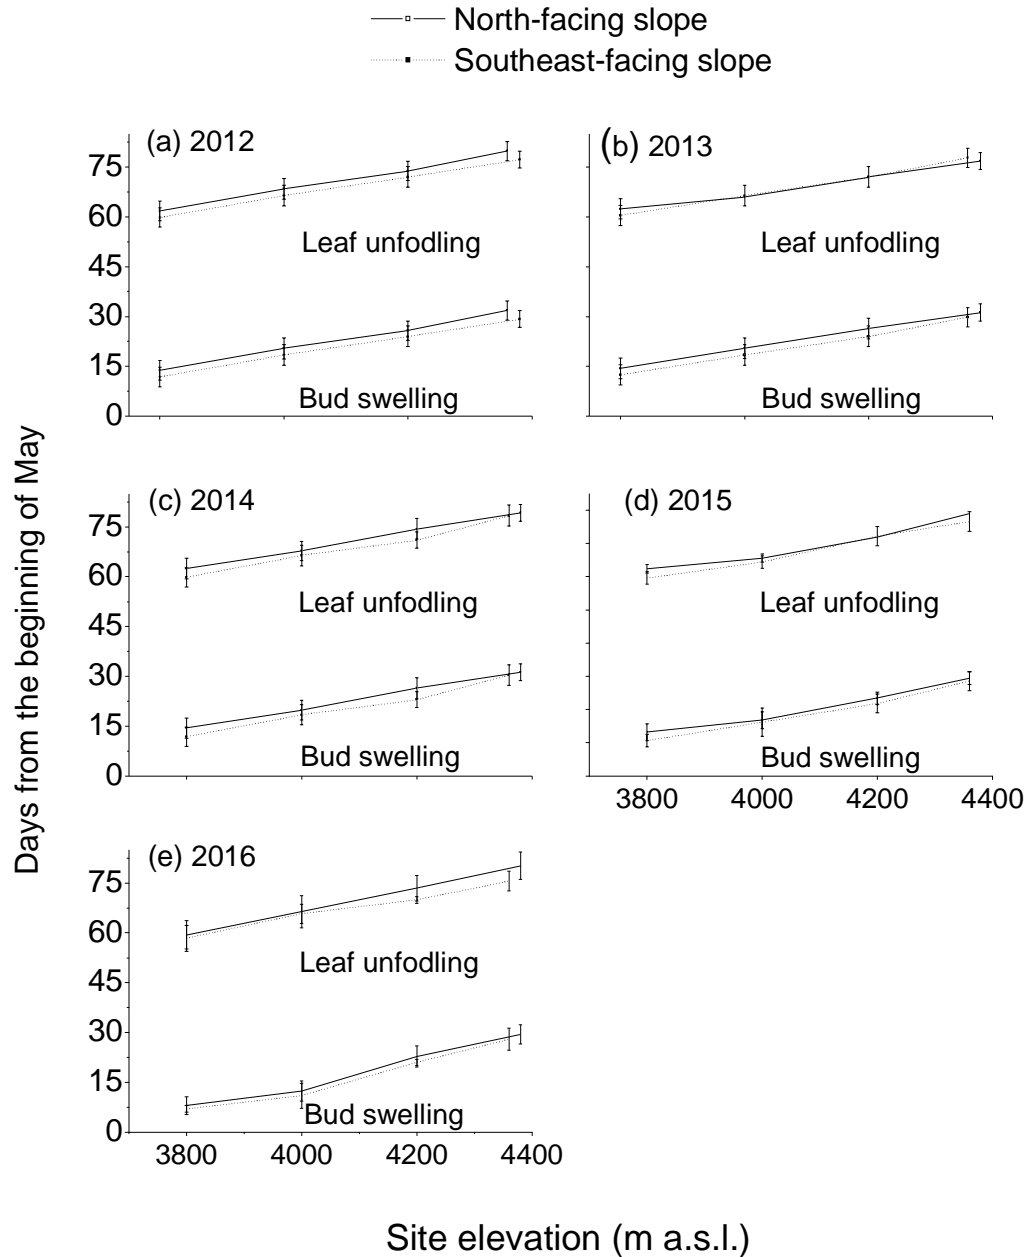

207

208 **Fig. 1** Variations (means  $\pm$  SD) in onset of bud swelling and leaf unfolding with altitude and  
209 aspect during four study years.

210

211 *Explanatory modelling of phenophase timings*

212 Our random forest models overall explained 84.8% of the variations in the onset of bud swelling

213 and 93.1% of the variation in the onset of leaf unfolding. The frequency of spring freezing events

214 and the last frost date were the most important predictors of bud swelling date (Fig. 2a). Of less  
215 importance were growing-degree days, maximum temperature, the minimum temperature, the  
216 measurement year, chilling days, and finally aspect (Fig. 2a). Mean safety margins were  $\geq 7 \pm 5$   
217 days and increased significantly with increasing elevation ( $r = 0.24$ ,  $P < 0.0001$ ,  $n = 364$ ) and  
218 among years ( $r = 0.27$ ,  $P < 0.0001$ ,  $n = 364$ ), but not with aspect ( $r = 0.04$ ,  $P = 0.36$ ,  $n = 364$ ).  
219 For leaf unfolding, onset of bud swelling was the most important predictor; the number of  
220 growing degree-days, minimum and maximum temperature ranked considerably lower, but were  
221 basically equivalent, in importance, followed by measurement year and aspect (Fig. 2b).

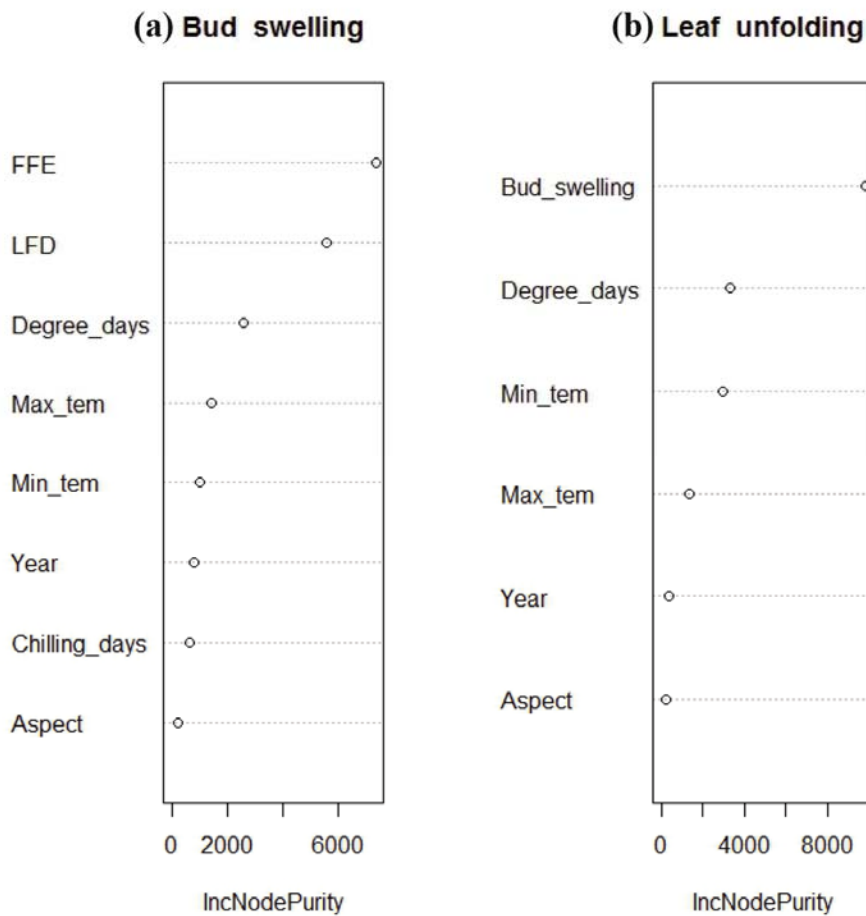

222

223 **Fig. 2** Ranked, relative importance of variables included in random forest models explaining  
224 variation in the onset dates of (a) bud swelling and (b) leaf unfolding.

225 **(a)**

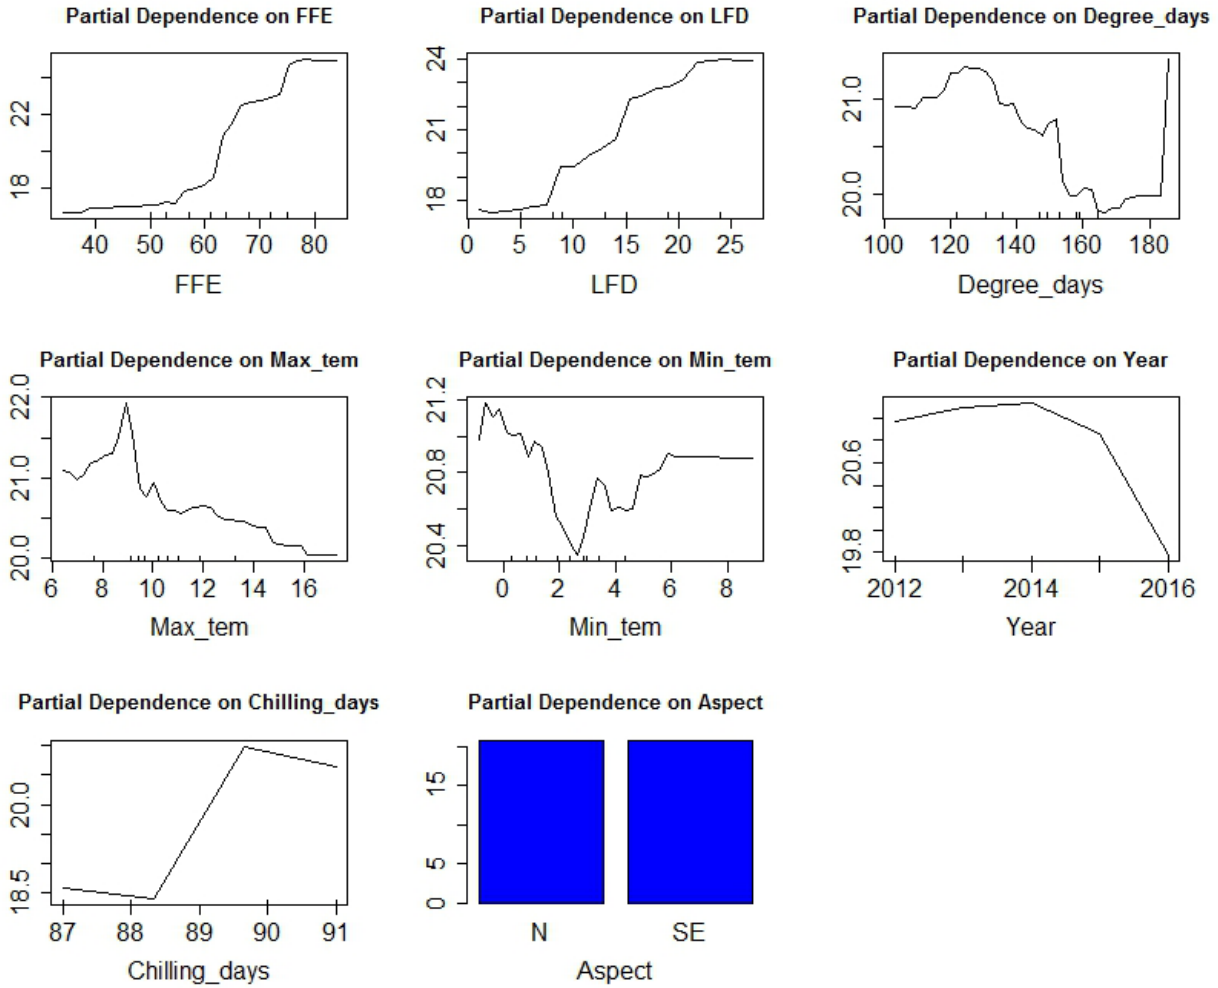

226

227 (b)

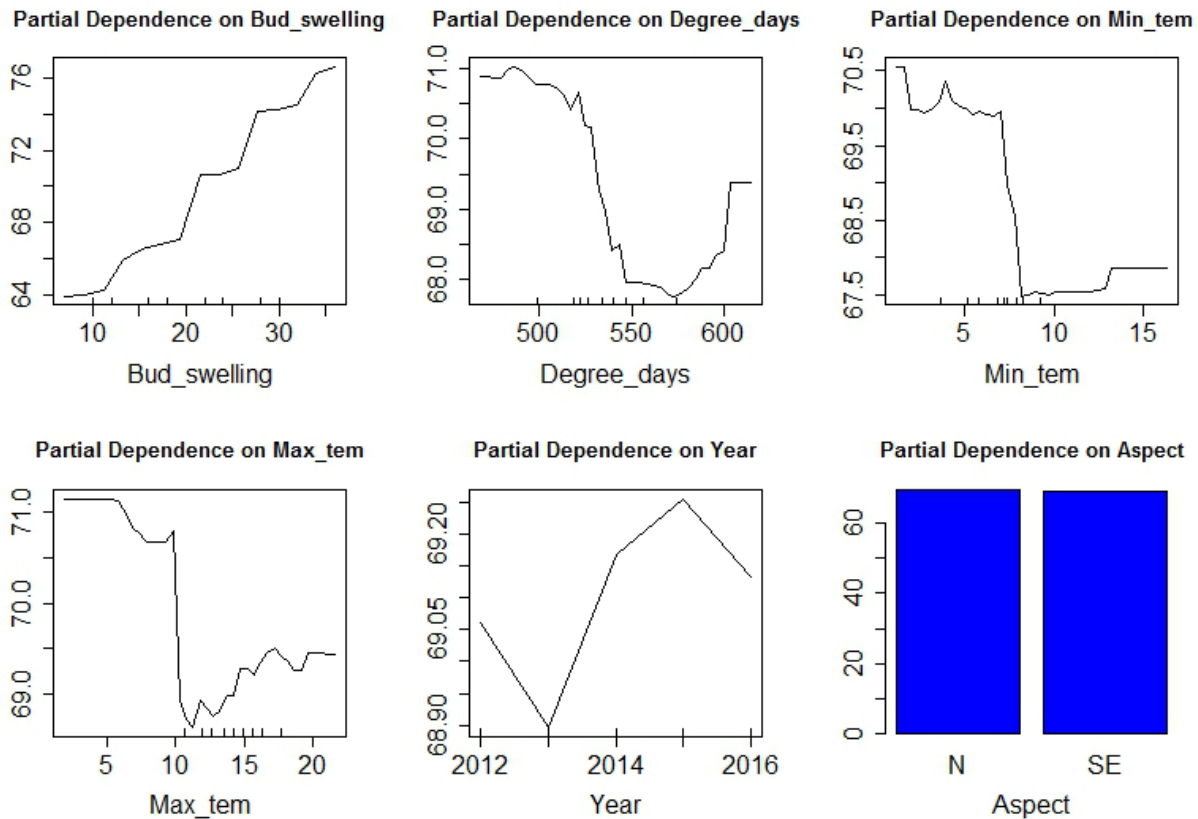

228

229 **Fig. 3** Partial dependence plots, based on results from the random forest analysis, showing the  
230 mean marginal influence of predictor variables on the onset date of (a) bud swelling and (b) leaf  
231 unfolding. Each plot represents the effect of one predictor variable on the response, while  
232 holding the other predictor variables constant at their mean values.

233 Partial dependence plots indicated that the three response variables often were related  
234 non-linearly to the predictor variables (Fig. 3), which in turn interacted in complex ways (Fig. 4).  
235 Bud swelling was positively and essentially linearly related to both the frequency of spring  
236 freezing events and the last freezing date, negatively related to the sum of growing degree-days  
237 and minimum temperature (Fig. 3a), and non-linearly related to the other variables (Fig. 3a).  
238 Conditional inference tree modelling suggested that whether bud swelling occurred at later or

239

240 (a)

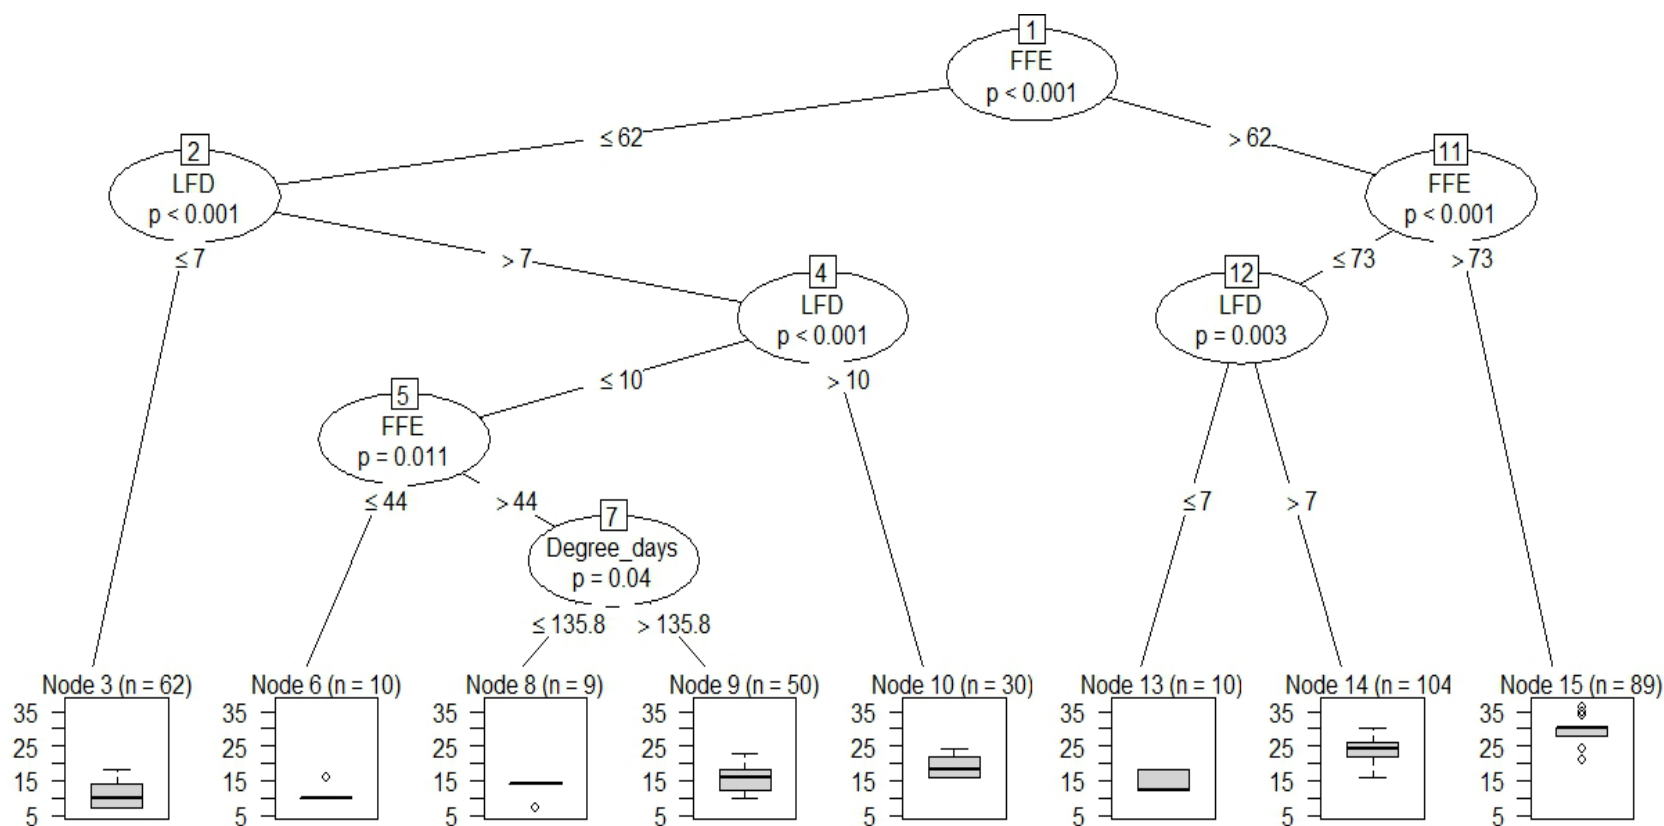

241

242

243

244



245 (b)

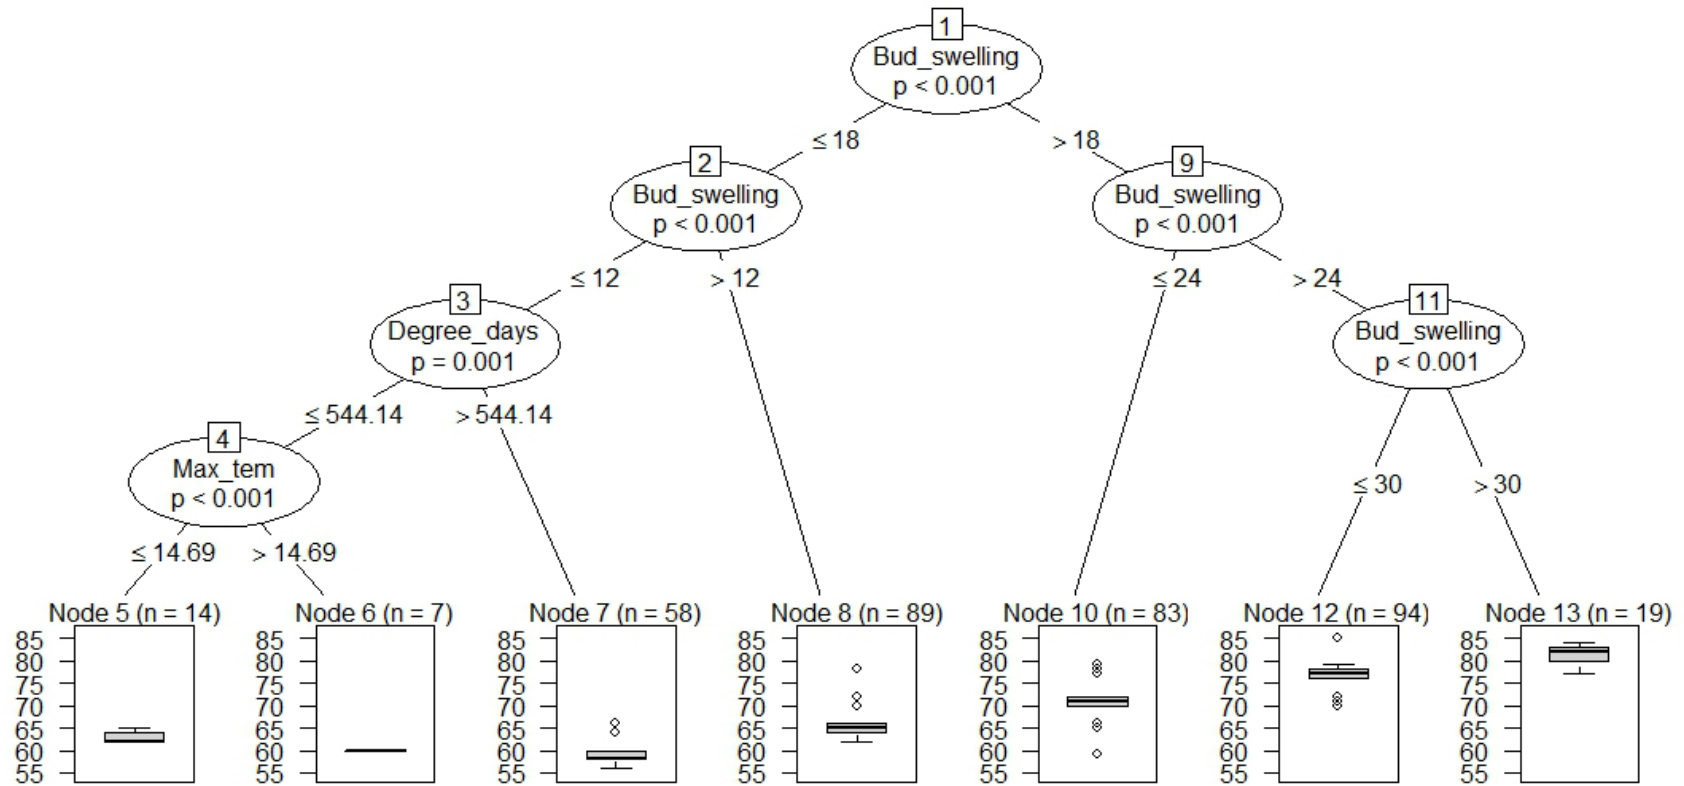

246

247 **Fig. 4** Conditional inference trees explaining variation in the onset date of: (a) bud swelling and (b) leaf unfolding based on sets of  
248 predictor variables (see Table 1). The trees show pathways of how the response data were recursively partitioned based on predictor  
249 variables. The observations associated with each terminal node are the result of these partitionings. P values at each node are from a  
250 Monte Carlo randomization test; in order for a split to occur  $P < 0.05$ .

251 earlier dates was largely controlled by the frequency of spring freezing events, with locations  
252 experiencing more than 62 freezing days in spring having the latest bud swelling dates; for  
253 earlier-onset locations (less than 62 freezing days), other factors such as last freezing date, the  
254 sum of growing degree days interacted to explain variability in earlier bud swelling timing (Fig.  
255 4a).

256 The timing of leaf unfolding onset was positively and linearly related to onset of bud  
257 swelling, and had a negative, *s*-shaped relationship with growing degree days, with a switch from  
258 later to earlier timing of leaf unfolding past a critical value for the sum of growing degree-days  
259 that fell within the range of 530 – 540 accumulated °C (Fig 4b); a similar critical minimum  
260 temperatures of 7 – 7.5 °C was also evident (Fig. 3b). The relationship between leaf unfolding  
261 date and maximum temperature was more complex (Fig. 3b) likely due to interaction effects with  
262 the sum of growing degree days, maximum and minimum temperature in explaining finer  
263 variation in this phenophase (Fig. 4b).

264

## 265 **Discussion**

266 A number of climatic variables can influence the onset and duration of plant phenophases, but  
267 research to date has tended to focus on temperature means rather than variance or extremes  
268 (Inouye, 2008; Wang et al., 2014), and on later phenophases such as flowering and leaf  
269 emergence. In contrast, the data we present here illustrates that timing of extreme events such as  
270 late spring frost and freezes, can strongly affect two phenophases, onset of bud swelling and leaf  
271 unfolding. The onset of bud swelling is of particular importance, because it is a prerequisite to  
272 the other important and well-studied phenophases. Furthermore, we took advantage of five years

273 of data across a steep elevational gradient to provide additional information on climatic control  
274 of bud swelling and leaf unfolding.

275       The date of onset of bud swelling increased with elevation in all five years of this study. This  
276 result can be attributed directly to effects of temperature, as tree growth of Smith fir at high  
277 elevations is known to be limited by temperature (Liang *et al.*, 2010; Wang *et al.*, 2012).  
278 However, at high altitudes, trees are frequently exposed to large diurnal temperature fluctuations  
279 in spring (Ernakovich *et al.*, 2014) and meristematic tissues are especially vulnerable to damage  
280 from spring freezing (Gu *et al.*, 2008). Once development starts in spring, freezing resistance is  
281 irreversibly lost and trees cannot re-acclimate to low temperatures (Lenz *et al.*, 2013). In  
282 particular, the freezing resistance of trees decreases quickly as temperature increases during the  
283 de-hardening period (Lenz *et al.*, 2013). In some cases, abnormally warm weather followed by  
284 sudden cold waves (particularly freezing events) in early to mid-spring can have disastrous  
285 impacts on plants effects (Gu *et al.*, 2008). Thus, adaptations for avoidance of spring freezing  
286 damage are critical for the survival and subsequent development of many tree species in  
287 temperate and cold regions (Kollas *et al.*, 2014). In our study, the frequency of freezing events  
288 and the date of the last hard freeze were the critical factors in regulating the timing of bud  
289 swelling. The normal date in late May of the last freeze that we observed matched that seen in  
290 the timing of snow melt at treeline in another study (Liu *et al.*, 2011). Safety margin for spring  
291 frost increased significantly with elevation, suggesting the strong directional selection due to late  
292 spring frosts and freezes (Dantec *et al.*, 2015). The negative effects of spring freezes on the  
293 survival of Smith fir seedlings (tree age  $\leq$  5yrs) had also been reported on the southeastern  
294 Tibetan Plateau (Shen *et al.*, 2014). It is likely that Smith fir escapes from the spring freezing  
295 injury at the upper treelines by delaying bud swelling until very late spring (Wang *et al.*, 2014).

296 Our results in combination with those from these other studies together support our  
297 hypothesis that frost-avoidance occurs in early phenophases of Smith fir, and our data provide  
298 the first empirical evidence that onset of spring phenology on the Tibetan Plateau is controlled  
299 primarily by spring frost, rather than the sum of growing degree-days.

300 Overall, these results are in line with phenological studies of deciduous broad-leaf trees in  
301 the eastern and western Alps (Lenz *et al.*, 2013; Kollas *et al.*, 2014) and Mount Fuji in Japan  
302 (Gansert, 2002), but different from what has been observed in warmer temperate forests where  
303 accumulation of growing degree-days is related more closely to phenological events (Peñuelas &  
304 Filella, 2001; Parmesan & Yohe, 2003; Wang *et al.*, 2011; Dai *et al.*, 2014). Our results partly  
305 explain the declining global warming effects on spring phenophases (Shen *et al.*, 2013), because  
306 climatic extreme events (e.g. spring frosts) tend to increase with warming (Inouye, 2000;  
307 Augspurger, 2013; IPCC, 2013). Although the accumulation of chilling days has been shown to  
308 regulate the responses of spring phenology to climatic warming in Europe (Fu *et al.*, 2015), the  
309 impact of chilling on the timing of bud swelling was negligible in our study. In addition,  
310 green-up date for grassland on the Tibetan Plateau is statistically related with mean minimum  
311 temperature during the pre-season in both arid and wet regions (Shen *et al.*, 2016). Comparisons  
312 between the findings of Shen *et al.* (2016) and our results suggest that spring phenology of  
313 different alpine plant function types might respond to different temperature variables.

314 The onset of leaf unfolding from the lowest to highest sites occurred in the warmest period  
315 of the growing season (from late June to mid-July) when freezing events were absent, and was  
316 driven more by the onset of bud swelling. This result suggested that earlier bud swelling  
317 translated into earlier leaf unfolding. Presumably, the annual growth cycle of trees forms an  
318 integrated system, where one phenophase can affect or regulate the subsequent phase (Fu *et al.*,

319 2014a). Such carryover effects have also been reported in temperate and boreal forests (see  
320 review in Fu *et al.*, 2014a). Unexpectedly, the sum of growing degree-days played a secondary  
321 role in controlling onset of leaf unfolding. These results are different from other studies  
322 conducted in temperate, boreal, and some alpine forests where accumulation of degree-days is  
323 the major determinant of the onset of leaf unfolding (Peñuelas & Filella, 2001; Parmesan & Yohe,  
324 2003; Wang *et al.*, 2011; Dai *et al.*, 2014).

325 Last, our data provide evidence that warming may promote an advance in the timing of  
326 spring phenophase. The elevational transect that we studied represents a temperature gradient of  
327 ca. 3.8 °C, or a lapse rate of -0.66 °C/100 m (Liang *et al.*, 2011). Therefore if the regional  
328 temperature warms by  $\approx 1$  °C, spring phenology could advance by 4.5 days, similar to the  
329 advancement of 4.6 days °C found in a meta-analysis of temperate plants around the world  
330 (Wolkovich *et al.*, 2012). It appears that the temperature sensitivity of bud swelling and leaf  
331 unfolding phenology is somewhat greater than the sensitivity of flowering phenology which was  
332 found to be 3.3 days/ 1°C warming (Miller-Rushing & Primack, 2008). Earlier spring  
333 phenologies that accompany a warming climate also may help to explain some observed upward  
334 shifts in alpine treelines, The 1.2 – 1.5 °C warming observed on the Tibetan Plateau in the last  
335 100 years has been paralleled by an up to 80-m upslope shift in treeline if species interactions do  
336 not constrain these shifts (Liang *et al.*, 2016).

337

### 338 **Acknowledgements**

339 This work was supported by the National Natural Science Foundation of China (41525001,  
340 41661144040) and the International Partnership Program of Chinese Academy of Sciences  
341 (131C11KYSB20160061). AME's participation in this project was supported by the Chinese

342 Academy of Sciences (CAS) President International Fellowship Initiative for Visiting Scientists,  
343 Grant no. 2016VBA074. We appreciate the great support from the Southeast Tibet Station for  
344 Alpine Environment, Observation and Research, CAS.

345

## 346 **References**

347 Augspurger CK (2013) Reconstructing patterns of temperature, phenology, and frost damage  
348 over 124 years: Spring damage risk is increasing. *Ecology*, **94**, 41-50.

349 Chen XQ, An S, Inouye D, Schwartz MD (2015) Temperature and snowfall trigger alpine  
350 vegetation green-up on the world's roof. *Global Change Biology*, **21**, 3635-3646.

351 Chuine I, Beaubien EG (2001) Phenology is a major determinant of tree species range. *Ecology*  
352 *Letters*, **4**, 500-510.

353 Cutler DR, Edwards TC, Beard KH, Cutler A, Hess KT (2007) Random forests for  
354 classification in ecology. *Ecology*, **88**, 2783-2792.

355 Dantec CF, Ducasse H, Capdevielle X, *et al.* (2015) Escape of spring frost and disease through  
356 phenological variations in oak populations along elevation gradients. *Journal of Ecology*, **103**,  
357 1044-1056.

358 Dai J, Wang H, Ge Q (2014) The spatial pattern of leaf phenology and its response to climate  
359 change in China. *International Journal of Biometeorology*, **58**, 521-528.

360 Davis CC, Willis CG, Connolly B, Kelly C, Ellison AM (2015) Herbarium records are reliable  
361 sources of phenological change driven by climate and provide novel insights into species'  
362 phenological cueing mechanisms. *American Journal of Botany*, **102**, 1599-1609.

- 363 Ernakovich JG, Hopping KA, Berdanier AB, *et al.* (2014) Predicted responses of arctic and  
364 alpine ecosystems to altered seasonality under climate change. *Global Change Biology*, **20**,  
365 3256-3269.
- 366 Forrest J, Miller-Rushing AJ (2010) Towards a synthetic understanding of the role of phenology  
367 in ecology and evolution. *Philosophical Transactions of the Royal Society B*, **365**, 3101-3112.
- 368 Fu YH, Campioli M, Vitasse Y, *et al.* (2014a) Variation in leaf flushing date influences autumnal  
369 senescence and next year's flushing date in two temperate tree species. *Proceedings the*  
370 *National Academy of Science*, **111**, 7355-7360.
- 371 Fu YH, Piao S, Zhao H, *et al.* (2014b) Unexpected role of winter precipitation in determining  
372 heat requirement for spring vegetation green-up at northern middle and high latitudes. *Global*  
373 *Change Biology*, **20**, 3743-3755.
- 374 Fu YH, Zhao H, Piao S, *et al.* (2015) Declining global warming effects on the phenology of  
375 spring leaf unfolding. *Nature*, **526**, 104-107.
- 376 Ge Q, Wang H, Rutishauser T, Dai J (2015) Phenological response to climate change in China: a  
377 meta-analysis. *Global Change Biology*, **21**, 265-274.
- 378 Gansert D (2002) *Betula ermanni*, a dominant subalpine and subarctic treeline tree species in  
379 Japan: Ecological traits of deciduous tree life in winter. *Arctic, Antarctic and Alpine*  
380 *Research*, **34**, 57-64.
- 381 Gu L, Hanson PJ, Post WM, *et al.* (2008) The 2007 eastern US spring freezing: increased cold  
382 damage in a warming world. *Bioscience*, **58**, 253-262.
- 383 Hothorn T, Hornik K, Zeileis A (2006) Unbiased recursive partitioning: a conditional inference  
384 framework. *Journal of Computational and Graphical Statistics* **15**, 651-674.

- 385 Huang JG, Deslauriers A, Rossi S (2014) Xylem formation can be modeled statistically as a  
386 function of primary growth and cambium activity. *New Phytologist*, **203**, 831-841.
- 387 IPCC (2013) *Climate change 2013: The Physical Science Basis*. Contribution of working group I  
388 to the fifth assessment report of the intergovernmental panel on climate change, UK,  
389 Cambridge University Press, Cambridge.
- 390 Inouye DW (2000) The ecological and evolutionary significance of frost in the con-text of  
391 climate change. *Ecology Letters*, **3**, 457–463.
- 392 Inouye DW (2008) Effects of climate change on phenology, frost damage, and floral abundance  
393 of montane wildflowers. *Ecology*, **89**, 353-362
- 394 Kollas C, Körner C, Randin CF (2014) Spring frost and growing season length co-control the  
395 cold range limits of broad-leaved trees. *Journal of Biogeography*, **41**, 773-783.
- 396 Laube J, Sparks T, Esterlla N, *et al.* (2014) Chilling outweighs photoperiod in preventing  
397 precocious spring development. *Global Change Biology*, **20**, 170-182.
- 398 Lenz A, Hoch G, Vitasse Y, Körner C (2013) European deciduous trees exhibit similar safety  
399 margins against damage by spring freezing events along elevational gradients. *New*  
400 *Phytologist*, **200**, 1166-1175.
- 401 Li X, Liang E, Gričar J, *et al.* (2013) Age dependence of xylogenesis and its climatic sensitivity  
402 in Smith fir on the south-eastern Tibetan Plateau. *Tree Physiology*, **33**, 48-56.
- 403 Li X, Liang E, Gričar J, *et al.* (2017) Critical minimum temperature limits xylogenesis and  
404 maintains treelines on the southeastern Tibetan Plateau. *Science Bulletin*, **62**, 804–812.
- 405 Liang E, Wang Y, Eckstein D, Luo T (2011) Little change in the fir tree-line position on the  
406 southeastern Tibetan Plateau after 200 years of warming. *New Phytologist*, **190**, 760-769.



- 407 Liang E, Wang Y, Xu Y, Liu B, Shao X (2010) Growth variation in *Abies georgei* var. *smithii*  
408 along altitudinal gradients in the Sygera Mountains, southeastern Tibetan Plateau.  
409 *Trees-Structure and Function*, **24**, 363-373.
- 410 Liang E, Wang Y, Piao S, *et al.* (2016) Species interactions slow warming-induced upward shifts  
411 of treelines on the Tibetan Plateau. *Proceedings of the National Academy of Sciences of the*  
412 *United States of America*, **113**, 4380–4385.
- 413 Liaw A, Wiener M (2002) Classification and regression by randomForest. *R News*, **23**, 18-22.
- 414 Liu B, Liang L, Zhu L (2011) Microclimatic Conditions for *Juniperus saltuaria* Treeline in the  
415 Sygera Mountains, Southeastern Tibetan Plateau. *Mountain Research and Development*, **31**,  
416 45-53.
- 417 Menzel A (2003) Plant phenological anomalies in Germany and their relation to air temperature  
418 and NAO. *Climatic Change*, **57**, 243-263.
- 419 Miller-Rushing AJ, Høye TT, Inouye DW, Post E (2010) The effects of phenological mismatches  
420 on demography. *Philosophical Transactions of The Royal Society B Biological Sciences*, **365**,  
421 3177-3186.
- 422 Miller-Rushing AJ, Primack RB (2008) Global warming and flowering times in Thoreau's  
423 concord: a community perspective. *Ecology*, **89**, 332–341.
- 424 Parmesan C, Yohe G (2003) A globally coherent fingerprint of climate change impacts across  
425 natural systems. *Nature*, **421**, 37-42.
- 426 Peñuelas J, Filella I (2001) Phenology - Responses to a warming world. *Science*, **294**, 793-795.
- 427 Piao S, Cui M, Chen A, *et al.* (2011) Altitude and temperature dependence of change in the  
428 spring vegetation green-up date from 1982 to 2006 in the Qinghai-Xizang Plateau.  
429 *Agricultural and Forest Meteorology*, **151**, 1599-1608.

- 430 Piao S, Tan J, Chen A, *et al.* (2015) Leaf onset in the northern hemisphere triggered by daytime  
431 temperature. *Nature Communications*, **6**, 6911.
- 432 Richardson AD, Keenan TF, Migliavacca M, *et al.* (2013) Climate change, phenology, and  
433 phenological control of vegetation feedbacks to the climate system. *Agricultural and Forest  
434 Meteorology*, **169**, 156-173.
- 435 Schwartz MD, Ahas R, Aasa A (2006) Onset of spring starting earlier across the Northern  
436 Hemisphere. *Global Change Biology*, **12**, 343-351.
- 437 Shen M, Piao S, Chen X, *et al.* (2016) Strong impacts of daily minimum temperature on the  
438 green-up date and summer greenness of the Tibetan Plateau. *Global Change Biology*, **22**,  
439 3057-3066.
- 440 Shen M, Piao S, Cong N, Zhang G, Jassens I (2015a) Precipitation impact on vegetation spring  
441 phenology on the Tibetan Plateau. *Global Change Biology*, **21**, 3647-3656.
- 442 Shen M, Piao S, Dorji T, *et al.* (2015b). Plant phenological responses to climate change on the  
443 tibetan plateau: Research status and challenges. *National Science Review*, **22**, 454-467.
- 444 Shen M, Sun Z, Wang S, *et al.* (2013) No evidence of continuously advanced green-up dates in  
445 the Tibetan Plateau over the last decade. *Proceedings of the National Academy of Sciences of  
446 the United States of America*, **110**, E2329.
- 447 Shen W, Zhang L, Liu X, Luo T (2014) Seed-based treeline seedlings are vulnerable to freezing  
448 events in the early growing season under a warmer climate: Evidence from a reciprocal  
449 transplant experiment in the Sergyemla Mountains, southeast Tibet. *Agricultural and Forest  
450 Meteorology*, **187**, 83-92.
- 451 Wang T, Otle C, Peng S, *et al.* (2014) The influence of local spring temperature variance on  
452 temperature sensitivity of spring phenology. *Global Change Biology*, **20**, 1473-1480.

- 453 Wang X, Piao S, Ciais P, *et al.* (2011) Spring temperature change and its implication in the  
454 change of vegetation growth in North America from 1982 to 2006. *Proceedings of the*  
455 *National Academy of Sciences of the United States of America*, **108**, 1240-1245.
- 456 Wang Y, Čufar K, Eckstein D, Liang E (2012) Variation of maximum tree height and annual  
457 shoot growth of Smith fir at various elevations in the Sygera Mountains, southeastern Tibetan  
458 Plateau. *PLoS One*, **7**, e31725.
- 459 Wolkovich EM, Cook BI, Allen JM, *et al.* (2012) Warming experiments underpredict plant  
460 phenological responses to climate change. *Nature*, **485**, 494–497.
- 461 Yang B, He M, Shishov V, *et al.* (2017) New perspective on spring vegetation phenology and  
462 global climate change based on Tibetan Plateau tree-ring data. *Proceedings of the National*  
463 *Academy of Sciences of the United States of America*, doi: 10.1073/pnas.1616608114.
- 464 Yu H, Luedeling E, Xu J (2010) Winter and spring warming result in delayed spring phenology  
465 on the Tibetan Plateau. *Proceedings of the National Academy of Sciences of the United States*  
466 *of America*, **107**, 22151–22156
- 467 Zhang G, Zhang Y, Dong J, Xiao X (2013) Green-up dates in the Tibetan Plateau have  
468 continuously advanced from 1982 to 2011. *Proceedings of the National Academy of Sciences*  
469 *of the United States of America*, **110**, 4309-4314.
- 470 Zimmermann N, Yoccoz NG, Edwards TC, *et al.* (2009) Climatic extremes improve predictions  
471 of spatial patterns of tree species. *Proceedings of the National Academy of Sciences of the*  
472 *United States of America*, **106**, 19723-19728.
- 473

474 **Supporting information captions**

475 **Table S1** *Tree height and age of Smith fir individuals at four elevations along two altitudinal*  
476 *transects. Note that the height and age of each sampled tree was determined in April 2012, when*  
477 *buds were dormant.*

478

479 **Fig. S1** *Location of the study sites, the meteorological station at Nyingchi (3,000 m a.s.l.) in the*  
480 *southeastern Tibet. SE and N and the number represent the slopes and the site elevation (m a.s.l.),*  
481 *respectively. Inset (upper right corner) indicates the position of the study region on the Tibetan*  
482 *Plateau.*

483 **Supporting information**

484 **Table S1**

| Transect 1 | Code of trees | Tree height (cm) | Age (years) |
|------------|---------------|------------------|-------------|
| SE4360     | SE4360-1      | 47               | 26          |
|            | SE4360-2      | 133              | 40          |
|            | SE4360-3      | 119              | 28          |
|            | SE4360-4      | 48               | 18          |
|            | SE4360-5      | 108              | 34          |
|            | SE4360-6      | 98               | 31          |
|            | SE4360-7      | 73               | 26          |
|            | SE4360-8      | 53               | 20          |
|            | SE4360-9      | 93               | 28          |
|            | SE4360-10     | 99               | 24          |
| SE4200     | SE4200-1      | 77               | 16          |
|            | SE4200-2      | 120              | 21          |
|            | SE4200-3      | 130              | 20          |
|            | SE4200-4      | 79               | 13          |
|            | SE4200-5      | 69               | 20          |
|            | SE4200-6      | 48               | 13          |
| SE4000     | SE4000-1      | 79               | 18          |
|            | SE4000-2      | 68               | 21          |
|            | SE4000-3      | 138              | 16          |
|            | SE4000-4      | 133              | 16          |
|            | SE4000-5      | 102              | 18          |
|            | SE4000-6      | 133              | 18          |
|            | SE4000-7      | 84               | 22          |
|            | SE4000-8      | 94               | 14          |
|            | SE4000-9      | 80               | 14          |
|            | SE4000-10     | 84               | 19          |
| SE3800     | SE3800-1      | 154              | 20          |
|            | SE3800-2      | 124              | 18          |
|            | SE3800-3      | 118              | 18          |
|            | SE3800-4      | 98               | 18          |
|            | SE3800-5      | 70               | 14          |
|            | SE3800-6      | 149              | 18          |
|            | SE3800-7      | 141              | 18          |
|            | SE3800-8      | 157              | 17          |
|            | SE3800-9      | 74               | 17          |
|            | SE3800-10     | 155              | 15          |

| Transect 2 | Code of trees | Tree height (cm) | Age (years) |
|------------|---------------|------------------|-------------|
| N4380      | N4380-1       | 85               | 25          |
|            | N4380-2       | 105              | 24          |
|            | N4380-3       | 125              | 31          |
|            | N4380-4       | 130              | 34          |
|            | N4380-5       | 120              | 26          |
|            | N4380-6       | 120              | 29          |
|            | N4380-7       | 165              | 27          |
|            | N4380-8       | 90               | 23          |
|            | N4380-9       | 170              | 28          |
|            | N4380-10      | 155              | 21          |
| N4200      | N4200-1       | 145              | 33          |
|            | N4200-2       | 157              | 36          |
|            | N4200-3       | 165              | 39          |
|            | N4200-4       | 120              | 32          |
|            | N4200-5       | 140              | 38          |
|            | N4200-6       | 130              | 39          |
|            | N4200-7       | 110              | 38          |
|            | N4200-8       | 110              | 28          |
|            | N4200-9       | 115              | 27          |
|            | N4200-10      | 130              | 44          |
| N4000      | N4000-1       | 45               | 10          |
|            | N4000-2       | 145              | 16          |
|            | N4000-3       | 70               | 10          |
|            | N4000-4       | 170              | 24          |
|            | N4000-5       | 113              | 19          |
|            | N4000-6       | 144              | 18          |
|            | N4000-7       | 183              | 22          |
|            | N4000-8       | 72               | 13          |
|            | N4000-9       | 70               | 13          |
|            | N4000-10      | 73               | 11          |
| N3800      | N3800-1       | 150              | 17          |
|            | N3800-2       | 115              | 20          |
|            | N3800-3       | 130              | 18          |
|            | N3800-4       | 165              | 24          |
|            | N3800-5       | 62               | 21          |
|            | N3800-6       | 180              | 26          |
|            | N3800-7       | 150              | 34          |
|            | N3800-8       | 80               | 29          |
|            | N3800-9       | 55               | 11          |
|            | N3800-10      | 39               | 10          |

485

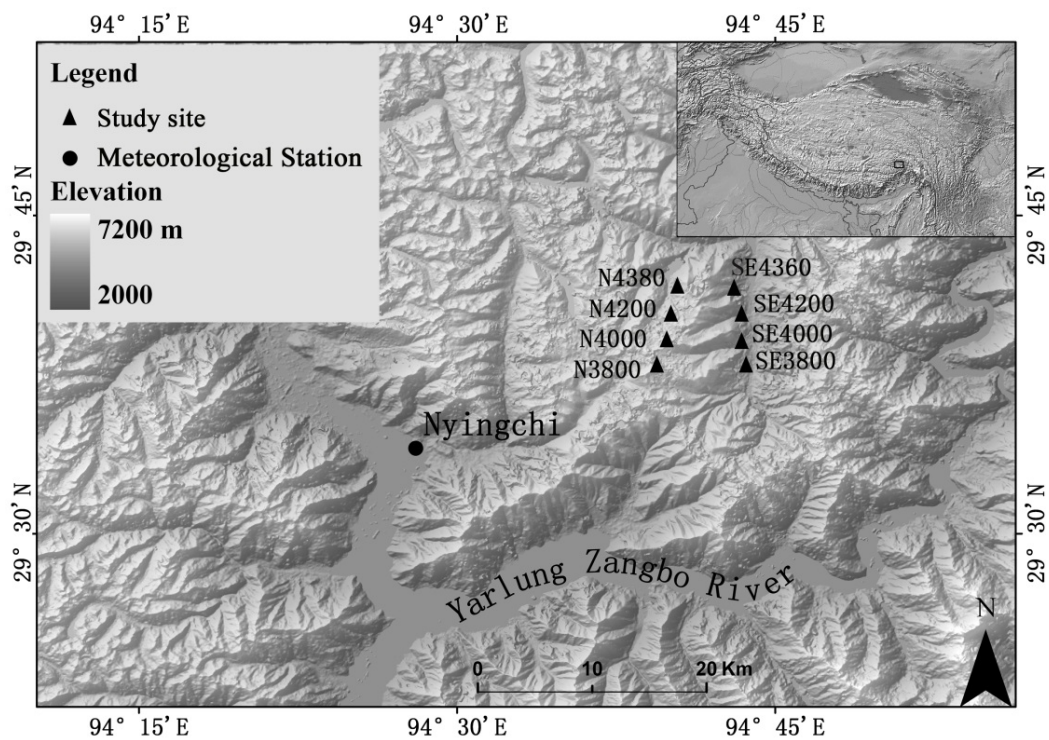

486

487 **Figure S1**

488
